# Supplementary material
Source: Springer Nature journal article supplement (https://www.springermedizin.de/resource/supplementary/13023_2009_176_MOESM14_ESM.pdf/9641796)

a.

# MLPA protocol

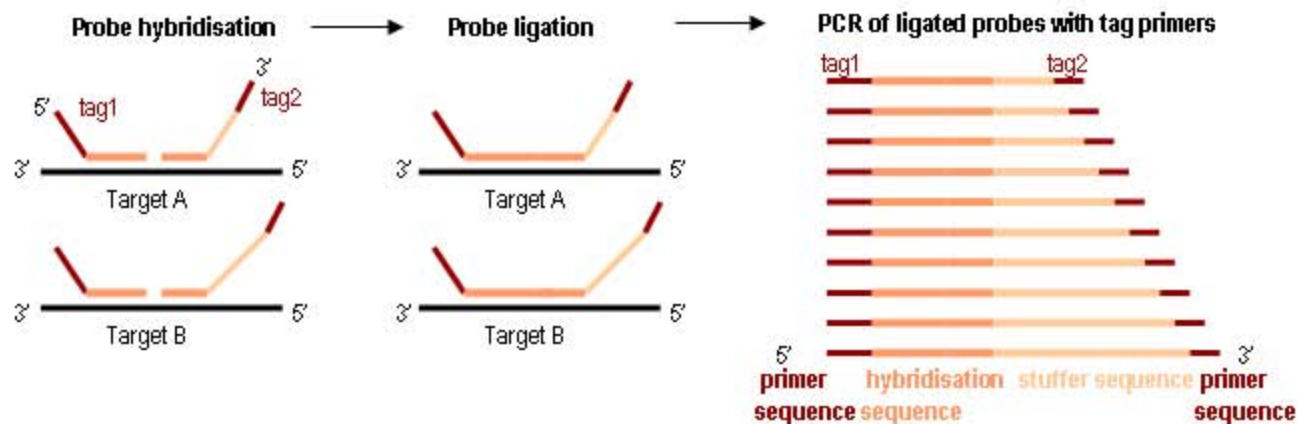

b.

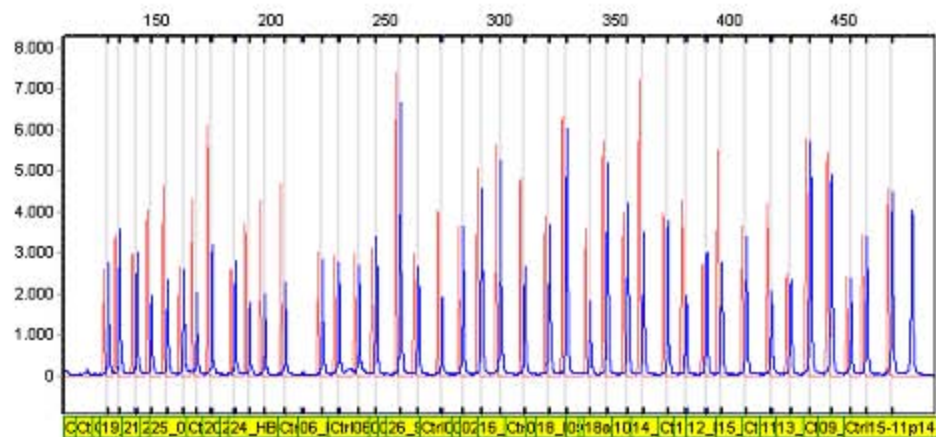

c.

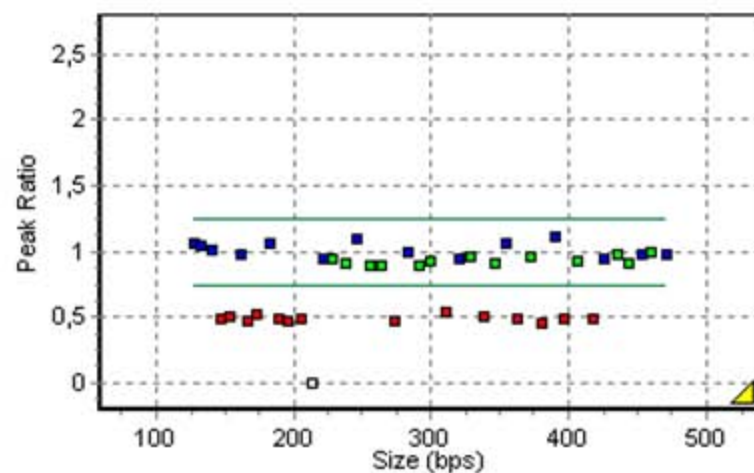

Supplement: MOESM14 [file 9641796]
